# Supplementary material
Source: publisher figshare collection journal article supplement (https://tandf.figshare.com/ndownloader/files/22285530)
Supplement: Supplementary file 1 [file 22285530]

## Technical Appendix

**Table A1. Planning departments’ REPO-like approaches and resultant changes to rules and norms.**

| How organizations are racialized*                    | REPO example                                                                                                                                                                                                                                                                                                                                                                                                                                                                                                                                                                      | Changes to rules and norms                                                                                                                                                                   |
|------------------------------------------------------|-----------------------------------------------------------------------------------------------------------------------------------------------------------------------------------------------------------------------------------------------------------------------------------------------------------------------------------------------------------------------------------------------------------------------------------------------------------------------------------------------------------------------------------------------------------------------------------|----------------------------------------------------------------------------------------------------------------------------------------------------------------------------------------------|
| Enhance or diminish the agency of racial groups      | Philadelphia’s Department of Licenses and Inspections collaborated with Philly 311 to examine “maintenance residential” and “vacant house” service request response times. The study found that neighborhoods of color experienced higher wait times (Swanson & Sickout, 2017). To address this, the city planned to change response procedures, including the ability to correct workload imbalances when they occur.                                                                                                                                                            | <ul style="list-style-type: none"> <li>• Incorporated new data in analyses to assess disparate impacts</li> <li>• Developed interagency partnerships to address disparate impacts</li> </ul> |
| Legitimate the unequal distribution of resources     | The Boston Planning and Development Agency instituted a new policy that requires all RFP proposals seeking to develop public land to have a Diversity and Inclusion plan (Boston Department of Neighborhood Development, 2018). The plan must lay out the extent to which the proposal includes the meaningful participation of people of color and the businesses they own in construction, design, development, financing, operations, and ownership. The policy will apply to an estimated two million square feet of public land expected to be developed in the coming years | RFP proposal policy change                                                                                                                                                                   |
| Whiteness is a credential                            | Madison, Wisconsin’s Metro Transit applied the city’s new Racial Equity and Social Justice Initiative equitable hiring checklist in its succession planning for management hires (Madison Office of Civil Rights, 2016). The first woman of color was promoted to a management position in over twenty years due to the implementation of the new procedures                                                                                                                                                                                                                      | New succession planning tools and procedures                                                                                                                                                 |
| Decoupling formal rules from organizational practice | The Pittsburgh Urban Redevelopment Authority commissioned a report on how to improve outcomes for minority-owned firms doing business with the city (Exstare Federal Services Group, LLC, 2018). Based on the report’s recommendations and findings, the city hired someone to oversee the program, enhanced outreach efforts, and refined implementation procedures and compliance policies.                                                                                                                                                                                     | <ul style="list-style-type: none"> <li>• Added staff capacity</li> <li>• Refined compliance policies</li> </ul>                                                                              |

## References

**Boston Department of Neighborhood Development.** (2018, October 9). *New measures aim to*

*increase diversity in development, prevent displacement.* [Boston.Gov](https://www.boston.gov/news/new-measures-aim-increase-diversity-development-prevent-displacement). Retrieved from

<https://www.boston.gov/news/new-measures-aim-increase-diversity-development-prevent-displacement>

**Madison Office of Civil Rights.** (2016). *City projects using RESJI tools*. Madison, WI: Author.

Retrieved from <https://www.cityofmadison.com/civil-rights/programs/racial-equity-social-justice-initiative/city-projects-using-resji-tools>

**Exstare Federal Services Group, LLC.** (2018). *Urban Redevelopment Authority of Pittsburgh*

*racial equity assessment*. Retrieved from

[https://www.ura.org/media/W1siZiIsIjIwMTgvMTIvMDMvOTI1L2JkMm5zYV9GaW5hbF9SZXBvcnRfVGVJJBX1JhY2lhbF9FcXVpdHlfQXNzZXNzbWVudDIucGRmIl1d/Fin al%20Report\\_URA%20Racial%20Equity%20Assessment2.pdf](https://www.ura.org/media/W1siZiIsIjIwMTgvMTIvMDMvOTI1L2JkMm5zYV9GaW5hbF9SZXBvcnRfVGVJJBX1JhY2lhbF9FcXVpdHlfQXNzZXNzbWVudDIucGRmIl1d/Fin al%20Report_URA%20Racial%20Equity%20Assessment2.pdf)

**Swanson, R., & Sickout, N.** (2017, November 15). Equity in government services: How the city

of Philadelphia utilized a racial equity analysis to inform internal resource allocation and drive external outcomes. *Local and Regional Government Alliance on Race and Equity*.

Retrieved from <https://www.racialequityalliance.org/2017/11/15/equity-government-services-city-philadelphia-utilized-racial-equity-analysis-inform-internal-resource-allocation-drive-external-outcomes/>
